# Supplementary material for: CMR feature tracking in patients with dilated cardiomyopathy: patterns of myocardial strain and focal fibrosis
Source: HighWire-hosted journal article supplement (doi:10.1136/openhrt-2022-002013), 2022-12-01
Supplement: openhrt-2022-002013supp001_data_supplement.pdf [file openhrt-2022-002013supp001_data_supplement.pdf]

## SUPPLEMENTARY MATERIAL

Supplemental Table 1. Segmental strain parameters

| Strain parameters segmental (%) | Mean (IQR)             |
|---------------------------------|------------------------|
| <b>LV<sub>SAX</sub>-CS seg</b>  |                        |
| Segment I                       | -7.10 (-10.84, -4.03)  |
| Segment II                      | -4.42 (-8.13, -0.87)   |
| Segment III                     | -5.84 (-8.32, -2.02)   |
| Segment IV                      | -4.64 (-7.95, -1.60)   |
| Segment V                       | -10.83 (-13.87, -7.34) |
| Segment VI                      | -12.76 (-16.37, -8.92) |
| Segment VII                     | -4.96 (-8.74, -2.67)   |
| Segment VIII                    | -2.12 (-7.62, 0.58)    |
| Segment IX                      | -3.35 (-6.27, -0.10)   |
| Segment X                       | -4.79 (-7.71, -0.93)   |
| Segment XI                      | -8.07 (-11.61, -5.48)  |
| Segment XII                     | -6.79 (-10.46, -3.79)  |
| Segment XIII                    | -2.53 (-8.58, 3.90)    |
| Segment XIV                     | -1.91 (-10.93, 5.71)   |
| Segment XV                      | -9.77 (-16.38, -3.46)  |
| Segment XVI                     | -5.78 (-10.83, 0.41)   |
| <b>LV<sub>SAX</sub>-RS seg</b>  |                        |
| Segment I                       | 21.77 (5.42 – 37.25)   |
| Segment II                      | 6.64 (-0.32 – 11.36)   |
| Segment III                     | 4.55 (-8.72 – 15.28)   |
| Segment IV                      | 13.26 (2.53 – 23.01)   |
| Segment V                       | 31.66 (15.72 – 49.89)  |
| Segment VI                      | 28.50 (9.24 – 47.44)   |
| Segment VII                     | 12.86 (-1.81 – 23.04)  |
| Segment VIII                    | 22.59 (10.64 – 34.36)  |
| Segment IX                      | 17.68 (7.80 – 31.16)   |
| Segment X                       | 15.61 (0.11 – 26.75)   |
| Segment XI                      | 25.35 (9.44 – 34.35)   |
| Segment XII                     | 18.06 (5.00 – 33.27)   |
| Segment XIII                    | 22.79 (7.53 – 33.59)   |
| Segment XIV                     | 33.29 (-2.03 – 69.14)  |
| Segment XV                      | 25.87 (8.07 – 36.51)   |
| Segment XVI                     | 16.34 (2.30 – 25.20)   |

Segmental values for circumferential and radial strain are given as mean and interquartile range (Q1 and Q3) for each segment according the AHA segment model

[15]. Abbreviations: *CS*, circumferential strain; *LV*, left ventricular; *RS*, radial strain; *SAX*, short axis; *seg*, segmental.
